# Supplementary material
Source: PubMed Central journal article supplement (PMC3170873)
Supplement: NIHMS314713-supplement-1_si_001.pdf [file NIHMS314713-supplement-1_si_001.pdf]

SUPPLEMENTAL MATERIAL

# **Top-Down Quantitative Proteomics Identified Phosphorylation of Cardiac Troponin I as a Candidate Biomarker for Chronic Heart Failure**

Jiang Zhang<sup>¶†#</sup>, Moltu J. Guy<sup>¶</sup>, Holly S. Norman<sup>‡</sup>, Yi-Chen Chen<sup>¶</sup>, Qingge Xu<sup>¶‡</sup>, Xintong Dong<sup>¶</sup>,  
Huseyin Guner<sup>¶</sup>, Sijian Wang<sup>§</sup>, Takushi Kohmoto<sup>††</sup>, Ken H. Young<sup>⊥</sup>, Richard L. Moss<sup>¶‡</sup>, Ying Ge<sup>¶‡\*</sup>

<sup>¶</sup>Human Proteomics Program, <sup>‡</sup>Department of Physiology, <sup>§</sup>Departments of Statistics and Biostatistics  
and Medical Informatics, <sup>††</sup>Department of Surgery, <sup>⊥</sup>Department of Pathology and Laboratory Medicine,  
School of Medicine and Public Health; <sup>†</sup>School of Pharmacy, University of Wisconsin-Madison,  
Madison, WI, 53706

Running Title: Top-down proteomics for cardiac biomarker discovery

<sup>¶</sup> Corresponding author: Ying Ge, PhD. 1300 University Ave., SMI 130, Madison, WI 53706, Tel: 608-  
263-9212, Fax: 608-265-5512. E-mail: [yge@physiology.wisc.edu](mailto:yge@physiology.wisc.edu)

# Current address: 607 Charles East Young Dr., Dept. Chemistry and Biochemistry  
UCLA, Los Angeles, CA 90095.

## Supplemental Tables

Table S1. Clinical characteristics of postmortem human heart samples. NOR, controls with normal cardiac function; HYP, mild hypertrophy; SHD, severe hypertrophy/dilation; CHF, congestive heart failure; CAD, coronary artery disease; LV, left ventricle; RV, right ventricle; AA, African American; ACE, angiotensin-converting enzyme; ARB, angiotensin receptor blocker; CCB, Ca<sup>2+</sup> channel blocker. (-) indicates data not available.

| Subject# | Age | Sex | Race     | Heart Defect(s)                                 |
|----------|-----|-----|----------|-------------------------------------------------|
| NOR1     | 43  | M   | White    | None                                            |
| NOR2     | 86  | F   | White    | None                                            |
| NOR3     | 52  | M   | White    | None                                            |
| NOR4     | 58  | F   | White    | None                                            |
| NOR5     | 65  | F   | White    | None                                            |
| NOR6     | 21  | M   | AA       | None                                            |
| NOR7     | 66  | F   | White    | None                                            |
| HYP1     | 47  | F   | White    | LV hypertrophy                                  |
| HYP2     | 71  | F   | White    | Mild LV&RV hypertrophy                          |
| HYP3     | 53  | M   | White    | LV hypertrophy,                                 |
| HYP4     | 68  | M   | White    | LV hypertrophy                                  |
| HYP5     | 49  | F   | White    | Moderate hypertrophy                            |
| SHD1     | 20  | M   | White    | Severe LV hypertrophy& dilation, RV hypertrophy |
| SHD2     | 61  | F   | Hispanic | Arrhythmia, severe dilation                     |
| SHD3     | 65  | M   | White    | Severe hypertrophy                              |
| SHD4     | 71  | M   | White    | Severe hypertrophy &dilation                    |
| CHF1     | 39  | M   | White    | CHF, severe CAD                                 |
| CHF2     | 66  | M   | White    | Severe CAD, CHF                                 |
| CHF3     | 55  | M   | White    | Severe CAD & CHF                                |
| CHF4     | 85  | F   | White    | CHF, Mild CAD,                                  |
| CHF5     | 85  | M   | White    | Severe CAD,CHF                                  |
| CHF6     | 54  | F   | White    | Severe CHF                                      |

| Subject # | Medication      |            |             |           |     |         |           |         |                  |           |
|-----------|-----------------|------------|-------------|-----------|-----|---------|-----------|---------|------------------|-----------|
|           | ACE - Inhibitor | ARB Agents | Amiod-arone | β-blocker | CCB | Digoxin | Diu-retic | Nitrate | Spiro-no-lactone | Warf-arin |
| HYP1      | n               | n          | n           | y         | y   | n       | y         | n       | n                | n         |
| HYP2      | n               | y          | n           | n         | n   | n       | n         | n       | n                | n         |
| HYP3      | n               | n          | n           | n         | n   | n       | y         | n       | n                | n         |
| HYP4      | n               | n          | n           | n         | n   | y       | y         | n       | n                | n         |

|      |   |   |   |   |   |   |   |   |   |   |
|------|---|---|---|---|---|---|---|---|---|---|
| HYP5 | n | n | n | n | n | n | y | n | n | n |
| SHD1 | n | n | n | y | n | n | y | n | n | n |
| SHD2 | - | - | - | - | - | - | - | - | - | - |
| SHD3 | y | n | n | n | n | n | n | n | n | n |
| SHD4 | y | n | n | y | n | n | y | n | n | n |
| CHF1 | n | n | n | y | n | n | y | y | n | n |
| CHF2 | n | n | n | y | n | y | y | y | n | n |
| CHF3 | y | n | n | y | n | n | y | n | n | n |
| CHF4 | n | n | n | n | n | n | n | n | n | n |
| CHF5 | n | n | n | n | n | n | n | n | n | n |
| CHF6 | n | n | n | n | n | n | y | n | n | n |

---

Table S2. Clinical characteristics of donor and end-stage failing hearts from transplant surgical operations. DOR, donor hearts with normal cardiac function but deemed unacceptable for transplants; ICM, ischemic cardiomyopathy; DCM, dilated cardiomyopathy. <sup>a</sup>, explanted tissues during operations; OCT, orthotopic cardiac transplantation; VAD, ventricular assist device. LVEF, left ventricular ejection fraction; ACE, angiotensin-converting enzyme; ARB, angiotensin receptor blockers; (-) indicates data not available.

| Subject # | Surgical operation <sup>a</sup> | Gender | Age | LVEF | Fractional shortening | Hypertension |
|-----------|---------------------------------|--------|-----|------|-----------------------|--------------|
| DOR1      | Donor                           | M      | 46  | -    | -                     | -            |
| DOR2      | Donor                           | F      | 59  | -    | -                     | -            |
| DOR3      | Donor                           | M      | -   | -    | -                     | -            |
| DOR4      | Donor                           | F      | 14  | -    | -                     | -            |
| ICM1      | OCT                             | M      | 52  | 10%  | -                     | y            |
| ICM2      | VAD                             | M      | 65  | 10%  | -                     | n            |
| ICM3      | VAD                             | M      | 54  | 15%  | 4-29%                 | y            |
| ICM4      | VAD                             | M      | 67  | 30%  | 9-29%                 | y            |
| ICM5      | VAD                             | M      | 61  | 30%  | -                     | n            |
| ICM6      | OCT                             | M      | 63  | 25%  | 28-29%                | n            |
| DCM1      | VAD                             | M      | 56  | 10%  | 7-29%                 | n            |
| DCM2      | VAD                             | M      | 64  | 25%  | -                     | y            |
| DCM3      | OCT                             | M      | -   | -    | -                     | -            |
| DCM4      | VAD                             | M      | -   | -    | -                     | -            |

| Subject # | Medication in mg/day |            |            |                  |         |          |         |                        |           |
|-----------|----------------------|------------|------------|------------------|---------|----------|---------|------------------------|-----------|
|           | ACE Inhibitor        | ARB Agents | Amiodarone | $\beta$ -blocker | Digoxin | Diuretic | Nitrate | Aldosterone antagonist | Warf-arin |
| ICM1      | 5                    | 0          | 200        | 12.5             | 0       | 160      | 0       | 25                     | 0         |
| ICM2      | 30                   | 0          | 0          | 25               | 62.5    | 0        | 0       | 12.5                   | 0         |
| ICM3      | 0                    | 25         | 0          | 0                | 0       | 80       | 0       | 25                     | 5         |
| ICM4      | 0                    | 80         | 320        | 50               | 0.25    | 40       | 0       | 0                      | 2.5       |
| ICM5      | 0                    | 0          | 0          | 25               | 0       | 790      | 90      | 50                     | 2.5       |
| ICM6      | 0                    | 0          | 0          | 0                | 0       | 160      | 0       | 0                      | 7.5       |
| DCM1      | 30                   | 0          | 0          | 100              | 0.25    | 320      | 0       | 50                     | 4         |
| DCM2      | 0                    | 0          | 0          | 25               | 0.125   | 160      | 30      | 0                      | 7.5       |
| DCM3      | -                    | -          | -          | -                | -       | -        | -       | -                      | -         |
| DCM4      | -                    | -          | -          | -                | -       | -        | -       | -                      | -         |

Table S3. ECD fragment list and ion assignments of mono-phosphorylated cTnI ( $p$ cTnI) from normal heart samples in support of Fig. 5A and S3a.  $c/z^{\bullet}$  ions containing mono-phosphorylation were labeled as " $p$ ". Please note that  $c$  ions counts from the N-terminus and  $z^{\bullet}$  counts from the C-terminus. E.g.,  $c_{21}$  covers the first 21 amino acids from the N-terminus (residues 1-21) and  $z^{\bullet}_{21}$  covers the first 21 amino acids from the C-terminus (residues 189-209). Ser22 was identified as the phosphorylation site for the following reasons: (1) No phosphorylated product ions were detected for smaller  $c$  ions before Ser22 ( $c_9 - c_{21}$ ). (2) The detection of mono-phosphorylated  $c_{22}$  ( $p$  $c_{22}$ ) clearly identified the phosphorylation of Ser22, and the absence of un-phosphorylated  $c_{22}$  indicated the nearly exclusive phosphorylation occupancy at Ser22 in  $p$ cTnI. (3) All the larger  $c$  ions ( $c_{23} - c_{208}$ ) were present only as mono-phosphorylated forms, supporting the phosphorylation site assignment at Ser22. This is also consistent with the fact that all the  $z^{\bullet}$  ions ( $z^{\bullet}_3 - z^{\bullet}_{186}$ ) which do not cover Ser22 were detected in their un-phosphorylated form and  $z^{\bullet}$  ions ( $z^{\bullet}_{208}$ ) including Ser22 was detected in its mono-phosphorylated form only.

| Observed most abundant M/Z | Charge state | Experimental monoisotopic mass (Da) | Fragment assignment | Calculated monoisotopic mass (Da) | Error (ppm) |
|----------------------------|--------------|-------------------------------------|---------------------|-----------------------------------|-------------|
| 890.397                    | 1            | 889.389                             | $c_9$               | 889.389                           | 0.3         |
| 769.372                    | 2            | 1536.730                            | $c_{15}$            | 1536.728                          | 1.4         |
| 853.419                    | 2            | 1704.824                            | $c_{17}$            | 1704.818                          | 3.7         |
| 909.954                    | 2            | 1817.894                            | $c_{18}$            | 1817.902                          | -4.5        |
| 659.343                    | 3            | 1974.004                            | $c_{19}$            | 1974.003                          | 0.5         |
| 711.377                    | 3            | 2130.106                            | $c_{20}$            | 2130.104                          | 0.8         |
| 572.810                    | 4            | 2286.206                            | $c_{21}$            | 2286.205                          | 0.3         |
| 819.078                    | 3            | 2453.211                            | $p$ $c_{22}$        | 2453.204                          | 2.9         |
| 848.087                    | 3            | 2540.238                            | $p$ $c_{23}$        | 2540.236                          | 0.9         |
| 664.825                    | 4            | 2654.272                            | $p$ $c_{24}$        | 2654.279                          | -2.6        |
| 940.460                    | 3            | 2817.347                            | $p$ $c_{25}$        | 2817.342                          | 1.7         |
| 744.619                    | 4            | 2973.446                            | $p$ $c_{26}$        | 2973.443                          | 0.9         |
| 282.723                    | 12           | 3379.597                            | $p$ $c_{30}$        | 3379.628                          | -9.2        |
| 722.550                    | 5            | 3605.706                            | $p$ $c_{32}$        | 3605.724                          | -5.0        |
| 937.212                    | 4            | 3742.783                            | $p$ $c_{33}$        | 3742.783                          | 0.1         |
| 764.169                    | 5            | 3813.809                            | $p$ $c_{34}$        | 3813.820                          | -2.9        |
| 679.674                    | 6            | 4069.993                            | $p$ $c_{36}$        | 4070.010                          | -4.1        |
| 701.027                    | 6            | 4198.102                            | $p$ $c_{37}$        | 4198.105                          | -0.7        |
| 715.531                    | 6            | 4285.142                            | $p$ $c_{38}$        | 4285.137                          | 1.1         |
| 736.878                    | 6            | 4413.216                            | $p$ $c_{39}$        | 4413.232                          | -3.6        |

|          |    |           |                           |           |      |
|----------|----|-----------|---------------------------|-----------|------|
| 705.366  | 7  | 4927.497  | <i>p</i> c <sub>44</sub>  | 4927.518  | -4.3 |
| 723.669  | 7  | 5055.628  | <i>p</i> c <sub>45</sub>  | 5055.613  | 2.9  |
| 862.951  | 6  | 5168.681  | <i>p</i> c <sub>46</sub>  | 5168.697  | -3.1 |
| 663.474  | 8  | 5296.750  | <i>p</i> c <sub>47</sub>  | 5296.755  | -1.1 |
| 677.614  | 8  | 5409.851  | <i>p</i> c <sub>48</sub>  | 5409.840  | 2.1  |
| 693.626  | 8  | 5537.938  | <i>p</i> c <sub>49</sub>  | 5537.934  | 0.6  |
| 807.002  | 7  | 5638.964  | <i>p</i> c <sub>50</sub>  | 5638.982  | -3.2 |
| 720.388  | 8  | 5752.043  | <i>p</i> c <sub>51</sub>  | 5752.066  | -4.0 |
| 734.524  | 8  | 5865.124  | <i>p</i> c <sub>52</sub>  | 5865.150  | -4.5 |
| 748.660  | 8  | 5978.216  | <i>p</i> c <sub>53</sub>  | 5978.234  | -3.0 |
| 235.980  | 26 | 6106.304  | <i>p</i> c <sub>54</sub>  | 6106.293  | 1.8  |
| 787.682  | 8  | 6290.376  | <i>p</i> c <sub>56</sub>  | 6290.414  | -6.0 |
| 1071.254 | 6  | 6418.475  | <i>p</i> c <sub>57</sub>  | 6418.509  | -5.3 |
| 728.735  | 9  | 6546.540  | <i>p</i> c <sub>58</sub>  | 6546.568  | -4.2 |
| 743.184  | 9  | 6675.582  | <i>p</i> c <sub>59</sub>  | 6675.610  | -4.3 |
| 755.748  | 9  | 6788.672  | <i>p</i> c <sub>60</sub>  | 6788.694  | -3.3 |
| 989.847  | 7  | 6917.874  | <i>p</i> c <sub>61</sub>  | 6917.737  | 19.8 |
| 787.431  | 9  | 7073.809  | <i>p</i> c <sub>62</sub>  | 7073.838  | -4.1 |
| 801.768  | 9  | 7202.844  | <i>p</i> c <sub>63</sub>  | 7202.881  | -5.0 |
| 809.666  | 9  | 7273.923  | <i>p</i> c <sub>64</sub>  | 7273.918  | 0.7  |
| 823.996  | 9  | 7402.892  | <i>p</i> c <sub>65</sub>  | 7402.960  | -9.2 |
| 943.003  | 8  | 7531.980  | <i>p</i> c <sub>66</sub>  | 7532.003  | -3.0 |
| 855.682  | 9  | 7688.086  | <i>p</i> c <sub>67</sub>  | 7688.104  | -2.3 |
| 785.827  | 10 | 7844.179  | <i>p</i> c <sub>68</sub>  | 7844.205  | -3.3 |
| 791.528  | 10 | 7901.191  | <i>p</i> c <sub>69</sub>  | 7901.227  | -4.6 |
| 893.832  | 9  | 8030.413  | <i>p</i> c <sub>70</sub>  | 8030.269  | 17.9 |
| 908.041  | 9  | 8158.294  | <i>p</i> c <sub>71</sub>  | 8158.364  | -8.6 |
| 762.503  | 11 | 8371.418  | <i>p</i> c <sub>73</sub>  | 8371.487  | -8.2 |
| 768.974  | 11 | 8442.622  | <i>p</i> c <sub>74</sub>  | 8442.524  | 11.6 |
| 730.062  | 12 | 8743.655  | <i>p</i> c <sub>77</sub>  | 8743.688  | -3.7 |
| 1272.968 | 7  | 8899.731  | <i>p</i> c <sub>78</sub>  | 8899.789  | -6.5 |
| 1423.434 | 12 | 17059.101 | <i>p</i> c <sub>148</sub> | 17059.204 | -6.0 |
| 1397.901 | 13 | 18147.608 | <i>p</i> c <sub>159</sub> | 18147.704 | -5.3 |

|          |    |           |                     |           |      |
|----------|----|-----------|---------------------|-----------|------|
| 1473.579 | 13 | 19131.287 | $p\mathbf{c}_{168}$ | 19131.244 | 2.3  |
| 1435.630 | 15 | 21506.473 | $p\mathbf{c}_{188}$ | 21506.511 | -1.7 |
| 915.684  | 26 | 23766.578 | $p\mathbf{c}_{207}$ | 23766.700 | -5.2 |
| 957.436  | 25 | 23895.697 | $p\mathbf{c}_{208}$ | 23895.743 | -1.9 |
| 406.258  | 1  | 405.251   | $z^{\bullet}_3$     | 405.250   | 0.8  |
| 494.236  | 1  | 493.228   | $z^{\bullet}_4$     | 493.230   | -3.3 |
| 622.330  | 1  | 621.322   | $z^{\bullet}_5$     | 621.325   | -4.0 |
| 750.424  | 1  | 749.417   | $z^{\bullet}_6$     | 749.420   | -3.8 |
| 453.768  | 2  | 905.521   | $z^{\bullet}_7$     | 905.521   | 0.2  |
| 482.278  | 2  | 962.542   | $z^{\bullet}_8$     | 962.542   | -0.1 |
| 546.800  | 2  | 1091.585  | $z^{\bullet}_9$     | 1091.585  | 0.3  |
| 612.320  | 2  | 1222.626  | $z^{\bullet}_{10}$  | 1222.625  | 0.2  |
| 640.829  | 2  | 1279.643  | $z^{\bullet}_{11}$  | 1279.647  | -3.3 |
| 725.885  | 2  | 1449.755  | $z^{\bullet}_{13}$  | 1449.752  | 1.9  |
| 776.404  | 2  | 1550.793  | $z^{\bullet}_{14}$  | 1550.800  | -4.4 |
| 833.917  | 2  | 1665.820  | $z^{\bullet}_{15}$  | 1665.827  | -4.3 |
| 675.025  | 3  | 2021.052  | $z^{\bullet}_{18}$  | 2021.049  | 1.3  |
| 1132.601 | 2  | 2262.188  | $z^{\bullet}_{19}$  | 2262.182  | 2.7  |
| 827.428  | 3  | 2478.258  | $z^{\bullet}_{21}$  | 2478.256  | 0.6  |
| 879.460  | 3  | 2634.351  | $z^{\bullet}_{23}$  | 2634.346  | 1.7  |
| 922.472  | 3  | 2763.394  | $z^{\bullet}_{24}$  | 2763.389  | 1.7  |
| 731.128  | 4  | 2919.477  | $z^{\bullet}_{25}$  | 2919.490  | -4.5 |
| 759.642  | 4  | 3033.533  | $z^{\bullet}_{26}$  | 3033.533  | 0.1  |
| 1069.223 | 3  | 3203.648  | $z^{\bullet}_{27}$  | 3203.638  | 2.9  |
| 823.926  | 4  | 3290.674  | $z^{\bullet}_{28}$  | 3290.670  | 1.2  |
| 685.352  | 5  | 3419.709  | $z^{\bullet}_{29}$  | 3419.713  | -1.1 |
| 1213.598 | 3  | 3635.776  | $z^{\bullet}_{31}$  | 3635.788  | -3.3 |
| 974.732  | 4  | 3892.900  | $z^{\bullet}_{33}$  | 3892.925  | -6.6 |
| 1006.759 | 4  | 4020.992  | $z^{\bullet}_{34}$  | 4021.020  | -7.0 |
| 1063.551 | 4  | 4248.171  | $z^{\bullet}_{36}$  | 4248.147  | 5.6  |
| 730.717  | 6  | 4376.246  | $z^{\bullet}_{37}$  | 4376.242  | 1.0  |

|          |    |           |                     |           |      |
|----------|----|-----------|---------------------|-----------|------|
| 899.273  | 5  | 4489.328  | $z_{38}^{\bullet}$  | 4489.326  | 0.5  |
| 899.273  | 5  | 4489.323  | $z_{38}^{\bullet}$  | 4489.326  | -0.7 |
| 810.259  | 6  | 4853.507  | $z_{41}^{\bullet}$  | 4853.523  | -3.4 |
| 829.273  | 6  | 4966.585  | $z_{42}^{\bullet}$  | 4966.607  | -4.6 |
| 867.295  | 6  | 5194.721  | $z_{44}^{\bullet}$  | 5194.718  | 0.6  |
| 1057.954 | 5  | 5281.756  | $z_{45}^{\bullet}$  | 5281.750  | 1.0  |
| 1083.761 | 5  | 5410.753  | $z_{46}^{\bullet}$  | 5410.793  | -7.4 |
| 1123.584 | 5  | 5609.942  | $z_{48}^{\bullet}$  | 5609.925  | 3.0  |
| 962.509  | 6  | 5765.997  | $z_{49}^{\bullet}$  | 5766.026  | -5.0 |
| 974.348  | 6  | 5837.027  | $z_{50}^{\bullet}$  | 5837.063  | -6.3 |
| 859.609  | 7  | 6007.207  | $z_{52}^{\bullet}$  | 6007.169  | 6.4  |
| 875.758  | 7  | 6120.250  | $z_{53}^{\bullet}$  | 6120.253  | -0.5 |
| 549.795  | 12 | 6581.454  | $z_{57}^{\bullet}$  | 6581.429  | 3.7  |
| 1733.392 | 4  | 6925.527  | $z_{61}^{\bullet}$  | 6925.563  | -5.2 |
| 1043.568 | 7  | 7293.915  | $z_{64}^{\bullet}$  | 7293.816  | 13.6 |
| 952.254  | 8  | 7605.977  | $z_{66}^{\bullet}$  | 7606.018  | -5.4 |
| 703.108  | 11 | 7719.108  | $z_{67}^{\bullet}$  | 7719.102  | 0.8  |
| 870.354  | 9  | 7820.090  | $z_{68}^{\bullet}$  | 7820.150  | -7.7 |
| 1154.902 | 7  | 8073.257  | $z_{70}^{\bullet}$  | 8073.304  | -5.9 |
| 836.347  | 10 | 8348.418  | $z_{72}^{\bullet}$  | 8348.467  | -5.9 |
| 854.862  | 10 | 8533.536  | $z_{74}^{\bullet}$  | 8533.584  | -5.6 |
| 801.711  | 11 | 8802.817  | $z_{76}^{\bullet}$  | 8802.769  | 5.4  |
| 812.170  | 11 | 8917.753  | $z_{77}^{\bullet}$  | 8917.796  | -4.8 |
| 878.661  | 11 | 9648.143  | $z_{83}^{\bullet}$  | 9648.234  | -9.4 |
| 906.580  | 12 | 10860.845 | $z_{94}^{\bullet}$  | 10860.905 | -5.5 |
| 904.413  | 13 | 11737.281 | $z_{101}^{\bullet}$ | 11737.303 | -1.8 |
| 1713.912 | 7  | 11981.279 | $z_{103}^{\bullet}$ | 11981.372 | -7.8 |
| 1533.679 | 14 | 21444.373 | $z_{186}^{\bullet}$ | 21444.531 | -7.4 |
| 1405.102 | 17 | 23854.560 | $z_{208}^{\bullet}$ | 23854.693 | -5.6 |



Table S4. ECD fragment list and ion assignments of mono-phosphorylated cTnI ( $p$ cTnI) from hypertrophy (HYP) heart samples in support of Fig. 5B and S3b.  $c/z^{\bullet}$  ions containing mono-phosphorylation were labeled as " $p$ ". Ser22 was identified as the phosphorylation site for the similar reasons as described in Table S3.

| Observed most abundant M/Z | Charge State | Observed monoisotopic mass (Da) | Fragment assignment | Calculated monoisotopic mass (Da) | Error (ppm) |
|----------------------------|--------------|---------------------------------|---------------------|-----------------------------------|-------------|
| 890.391                    | 1            | 889.384                         | $c_9$               | 889.389                           | -5.7        |
| 1116.485                   | 1            | 1115.478                        | $c_{11}$            | 1115.484                          | -6.0        |
| 769.372                    | 2            | 1536.730                        | $c_{15}$            | 1536.728                          | 1.4         |
| 853.418                    | 2            | 1704.821                        | $c_{17}$            | 1704.818                          | 1.6         |
| 909.960                    | 2            | 1817.906                        | $c_{18}$            | 1817.902                          | 1.9         |
| 988.516                    | 2            | 1974.006                        | $c_{19}$            | 1974.003                          | 1.4         |
| 711.378                    | 3            | 2130.107                        | $c_{20}$            | 2130.104                          | 1.5         |
| 763.411                    | 3            | 2286.208                        | $c_{21}$            | 2286.205                          | 1.3         |
| 819.077                    | 3            | 2453.207                        | $p$ $c_{22}$        | 2453.204                          | 1.4         |
| 848.088                    | 3            | 2540.238                        | $p$ $c_{23}$        | 2540.236                          | 1.1         |
| 664.824                    | 4            | 2654.263                        | $p$ $c_{24}$        | 2654.279                          | -5.8        |
| 940.459                    | 3            | 2817.352                        | $p$ $c_{25}$        | 2817.342                          | 3.4         |
| 744.620                    | 4            | 2973.448                        | $p$ $c_{26}$        | 2973.443                          | 1.8         |
| 677.331                    | 5            | 3379.617                        | $p$ $c_{30}$        | 3379.628                          | -3.3        |
| 722.554                    | 5            | 3605.730                        | $p$ $c_{32}$        | 3605.724                          | 1.7         |
| 749.967                    | 5            | 3742.795                        | $p$ $c_{33}$        | 3742.783                          | 3.3         |
| 764.174                    | 5            | 3813.823                        | $p$ $c_{34}$        | 3813.820                          | 1.0         |
| 658.324                    | 6            | 3941.892                        | $p$ $c_{35}$        | 3941.915                          | -5.6        |
| 679.673                    | 6            | 4069.986                        | $p$ $c_{36}$        | 4070.010                          | -5.9        |
| 841.031                    | 5            | 4198.113                        | $p$ $c_{37}$        | 4198.105                          | 2.1         |
| 715.527                    | 6            | 4285.112                        | $p$ $c_{38}$        | 4285.137                          | -5.8        |
| 736.877                    | 6            | 4413.212                        | $p$ $c_{39}$        | 4413.232                          | -4.4        |
| 670.488                    | 7            | 4684.360                        | $p$ $c_{42}$        | 4684.385                          | -5.3        |
| 682.921                    | 7            | 4771.386                        | $p$ $c_{43}$        | 4771.417                          | -6.4        |
| 705.369                    | 7            | 4927.527                        | $p$ $c_{44}$        | 4927.518                          | 1.9         |
| 844.107                    | 6            | 5055.587                        | $p$ $c_{45}$        | 5055.613                          | -5.2        |
| 739.824                    | 7            | 5168.707                        | $p$ $c_{46}$        | 5168.697                          | 2.0         |

|          |    |           |                 |           |      |
|----------|----|-----------|-----------------|-----------|------|
| 1060.964 | 5  | 5296.766  | $\rho c_{47}$   | 5296.755  | 2.0  |
| 774.272  | 7  | 5409.846  | $\rho c_{48}$   | 5409.840  | 1.2  |
| 792.566  | 7  | 5537.902  | $\rho c_{49}$   | 5537.934  | -5.8 |
| 706.258  | 8  | 5639.001  | $\rho c_{50}$   | 5638.982  | 3.3  |
| 720.394  | 8  | 5752.087  | $\rho c_{51}$   | 5752.066  | 3.7  |
| 734.523  | 8  | 5865.121  | $\rho c_{52}$   | 5865.150  | -5.0 |
| 748.658  | 8  | 5978.199  | $\rho c_{53}$   | 5978.234  | -6.0 |
| 692.380  | 9  | 6219.327  | $\rho c_{55}$   | 6219.377  | -8.0 |
| 714.509  | 9  | 6418.516  | $\rho c_{57}$   | 6418.509  | 1.1  |
| 728.734  | 9  | 6546.534  | $\rho c_{58}$   | 6546.568  | -5.1 |
| 743.189  | 9  | 6675.620  | $\rho c_{59}$   | 6675.610  | 1.5  |
| 1699.173 | 4  | 6788.653  | $\rho c_{60}$   | 6788.694  | -6.1 |
| 693.178  | 10 | 6917.699  | $\rho c_{61}$   | 6917.737  | -5.4 |
| 787.436  | 9  | 7073.852  | $\rho c_{62}$   | 7073.838  | 2.0  |
| 809.661  | 9  | 7273.879  | $\rho c_{64}$   | 7273.918  | -5.3 |
| 823.998  | 9  | 7402.957  | $\rho c_{65}$   | 7402.960  | -0.5 |
| 1077.583 | 7  | 7531.991  | $\rho c_{66}$   | 7532.003  | -1.5 |
| 989.162  | 8  | 7901.242  | $\rho c_{69}$   | 7901.227  | 1.9  |
| 817.345  | 10 | 8158.367  | $\rho c_{71}$   | 8158.364  | 0.4  |
| 857.069  | 10 | 8555.614  | $\rho c_{75}$   | 8555.608  | 0.7  |
| 796.340  | 11 | 8743.642  | $\rho c_{77}$   | 8743.688  | -5.3 |
| 751.654  | 12 | 9002.791  | $\rho c_{79}$   | 9002.798  | -0.7 |
| 800.101  | 12 | 9583.119  | $\rho c_{84}$   | 9583.120  | -0.1 |
| 674.697  | 15 | 10099.331 | $\rho c_{90}$   | 10099.390 | -5.8 |
| 1001.879 | 12 | 12003.450 | $\rho c_{106}$  | 12003.395 | 4.6  |
| 876.359  | 26 | 23619.482 | $\rho c_{206}$  | 23619.632 | -6.4 |
| 259.188  | 1  | 258.180   | $z^{\bullet}_2$ | 258.182   | -5.3 |
| 387.282  | 1  | 386.275   | $z^{\bullet}_3$ | 386.277   | -5.5 |
| 494.237  | 1  | 493.230   | $z^{\bullet}_4$ | 493.230   | 0.5  |
| 622.333  | 1  | 621.326   | $z^{\bullet}_5$ | 621.325   | 1.3  |
| 750.428  | 1  | 749.421   | $z^{\bullet}_6$ | 749.420   | 1.4  |
| 453.768  | 2  | 905.522   | $z^{\bullet}_7$ | 905.521   | 0.9  |
| 482.279  | 2  | 962.543   | $z^{\bullet}_8$ | 962.542   | 1.0  |

|          |   |          |                  |          |      |
|----------|---|----------|------------------|----------|------|
| 546.800  | 2 | 1091.586 | $z_{\bullet 9}$  | 1091.585 | 1.2  |
| 612.321  | 2 | 1222.627 | $z_{\bullet 10}$ | 1222.625 | 1.3  |
| 640.832  | 2 | 1279.650 | $z_{\bullet 11}$ | 1279.647 | 2.2  |
| 652.346  | 2 | 1302.677 | $z_{\bullet 12}$ | 1302.684 | -5.6 |
| 740.890  | 2 | 1479.765 | $z_{\bullet 13}$ | 1479.763 | 1.6  |
| 765.908  | 2 | 1529.802 | $z_{\bullet 14}$ | 1529.811 | -5.8 |
| 833.922  | 2 | 1665.830 | $z_{\bullet 15}$ | 1665.827 | 2.0  |
| 605.673  | 3 | 1813.997 | $z_{\bullet 16}$ | 1814.007 | -5.5 |
| 668.033  | 3 | 2000.076 | $z_{\bullet 17}$ | 2000.086 | -5.3 |
| 1059.059 | 2 | 2115.101 | $z_{\bullet 18}$ | 2115.113 | -5.9 |
| 727.059  | 3 | 2177.154 | $z_{\bullet 19}$ | 2177.150 | 1.8  |
| 789.086  | 3 | 2363.232 | $z_{\bullet 20}$ | 2363.229 | 1.1  |
| 1240.639 | 2 | 2478.262 | $z_{\bullet 21}$ | 2478.256 | 2.4  |
| 846.436  | 3 | 2535.283 | $z_{\bullet 22}$ | 2535.278 | 2.1  |
| 879.458  | 3 | 2634.350 | $z_{\bullet 23}$ | 2634.346 | 1.3  |
| 934.480  | 3 | 2799.416 | $z_{\bullet 24}$ | 2799.432 | -5.9 |
| 977.179  | 3 | 2927.511 | $z_{\bullet 25}$ | 2927.527 | -5.7 |
| 1012.522 | 3 | 3033.536 | $z_{\bullet 26}$ | 3033.533 | 1.0  |
| 1055.537 | 3 | 3162.580 | $z_{\bullet 27}$ | 3162.575 | 1.3  |
| 1098.235 | 3 | 3290.679 | $z_{\bullet 28}$ | 3290.670 | 2.6  |
| 1141.583 | 3 | 3419.719 | $z_{\bullet 29}$ | 3419.713 | 1.7  |
| 1178.263 | 3 | 3529.764 | $z_{\bullet 30}$ | 3529.782 | -5.1 |
| 1213.608 | 3 | 3635.803 | $z_{\bullet 31}$ | 3635.788 | 4.1  |
| 1256.623 | 3 | 3764.843 | $z_{\bullet 32}$ | 3764.830 | 3.3  |
| 972.754  | 4 | 3884.983 | $z_{\bullet 33}$ | 3885.004 | -5.5 |
| 1004.779 | 4 | 4013.077 | $z_{\bullet 34}$ | 4013.099 | -5.4 |
| 1033.048 | 4 | 4126.159 | $z_{\bullet 35}$ | 4126.183 | -5.9 |
| 1063.548 | 4 | 4248.156 | $z_{\bullet 36}$ | 4248.147 | 2.0  |
| 1095.571 | 4 | 4376.254 | $z_{\bullet 37}$ | 4376.242 | 2.7  |
| 1123.845 | 4 | 4489.344 | $z_{\bullet 38}$ | 4489.326 | 4.0  |
| 1158.108 | 4 | 4626.371 | $z_{\bullet 39}$ | 4626.385 | -3.1 |

|          |    |           |                     |           |      |
|----------|----|-----------|---------------------|-----------|------|
| 1175.866 | 4  | 4697.436  | $z_{40}^{\bullet}$  | 4697.422  | 3.0  |
| 810.263  | 6  | 4853.534  | $z_{41}^{\bullet}$  | 4853.523  | 2.1  |
| 985.123  | 5  | 4918.582  | $z_{42}^{\bullet}$  | 4918.607  | -5.1 |
| 1011.133 | 5  | 5047.609  | $z_{43}^{\bullet}$  | 5047.650  | -8.1 |
| 875.967  | 6  | 5246.751  | $z_{45}^{\bullet}$  | 5246.782  | -6.0 |
| 901.984  | 6  | 5402.861  | $z_{46}^{\bullet}$  | 5402.883  | -4.1 |
| 1096.387 | 5  | 5473.895  | $z_{47}^{\bullet}$  | 5473.920  | -4.5 |
| 1123.596 | 5  | 5609.926  | $z_{48}^{\bullet}$  | 5609.925  | 0.1  |
| 807.723  | 7  | 5643.992  | $z_{49}^{\bullet}$  | 5644.026  | -6.0 |
| 835.305  | 7  | 5837.077  | $z_{50}^{\bullet}$  | 5837.063  | 2.3  |
| 1002.708 | 6  | 6007.198  | $z_{52}^{\bullet}$  | 6007.169  | 4.9  |
| 1016.044 | 6  | 6087.215  | $z_{53}^{\bullet}$  | 6087.246  | -5.0 |
| 801.923  | 8  | 6404.291  | $z_{56}^{\bullet}$  | 6404.350  | -9.3 |
| 941.783  | 7  | 6581.434  | $z_{57}^{\bullet}$  | 6581.429  | 0.6  |
| 939.064  | 7  | 6562.387  | $z_{58}^{\bullet}$  | 6562.420  | -5.0 |
| 1129.599 | 6  | 6767.531  | $z_{59}^{\bullet}$  | 6767.493  | 5.6  |
| 1155.943 | 6  | 6925.617  | $z_{61}^{\bullet}$  | 6925.563  | 7.8  |
| 906.865  | 8  | 7242.836  | $z_{63}^{\bullet}$  | 7242.875  | -5.5 |
| 1043.552 | 7  | 7293.838  | $z_{64}^{\bullet}$  | 7293.816  | 3.0  |
| 1088.157 | 7  | 7606.046  | $z_{66}^{\bullet}$  | 7606.018  | 3.6  |
| 858.133  | 9  | 7710.139  | $z_{67}^{\bullet}$  | 7710.161  | -2.9 |
| 1010.549 | 8  | 8073.321  | $z_{70}^{\bullet}$  | 8073.304  | 2.1  |
| 758.417  | 11 | 8326.500  | $z_{72}^{\bullet}$  | 8326.542  | -5.0 |
| 845.466  | 10 | 8439.596  | $z_{73}^{\bullet}$  | 8439.626  | -3.6 |
| 949.741  | 9  | 8533.594  | $z_{74}^{\bullet}$  | 8533.584  | 1.2  |
| 792.525  | 11 | 8701.679  | $z_{75}^{\bullet}$  | 8701.721  | -4.9 |
| 979.650  | 9  | 8802.774  | $z_{76}^{\bullet}$  | 8802.769  | 0.6  |
| 775.178  | 12 | 9285.039  | $z_{80}^{\bullet}$  | 9285.091  | -5.6 |
| 878.667  | 11 | 9648.252  | $z_{83}^{\bullet}$  | 9648.234  | 1.9  |
| 831.378  | 14 | 11618.168 | $z_{100}^{\bullet}$ | 11618.229 | -5.3 |
| 857.329  | 14 | 11981.489 | $z_{103}^{\bullet}$ | 11981.372 | 9.8  |

Table S5. ECD fragment list and ion assignments of bis-phosphorylated cTnI ( $pp$ cTnI) from normal heart samples in support of Fig. 5C and S3c.  $c/z^{\bullet}$  ions containing mono-, or bis-phosphorylation were labeled as " $p$ ", or " $pp$ " respectively). Ser22 and Ser23 were identified as the phosphorylation sites for the similar reasons as described in Table S3.  $c_{22}$  was detected in its mono-phosphorylated form ( $p$  $c_{22}$ ) since it only contains one phosphorylation site (Ser22) whereas  $c_{23}$  and larger  $c$  ions was detected in their bis-phosphorylated forms (i.e.  $pp$  $c_{23}$ ) because they contain two phosphorylation sites, Ser22 and Ser23). The fact that neither un- nor mono-phosphorylated  $c_{23}$  and  $c_{24}$  ( $c_{23}$  and  $c_{24}$ ,  $p$  $c_{23}$  and  $p$  $c_{24}$ ) were observed suggests that Ser22/23 are the only two phosphorylation sites. Conversely, if other sites were phosphorylated (in case of positional isomers), one would expect to see un- and mono-phosphorylated  $c_{23}$  and  $c_{24}$ .

| Observed most abundant M/Z | Charge State | Experimental monoisotopic mass (Da) | Fragment assignment | Calculated monoisotopic mass (Da) | Error (ppm) |
|----------------------------|--------------|-------------------------------------|---------------------|-----------------------------------|-------------|
| 890.396                    | 1            | 889.389                             | $c_9$               | 889.389                           | 0.1         |
| 1116.488                   | 1            | 1115.481                            | $c_{11}$            | 1115.484                          | -3.2        |
| 769.371                    | 2            | 1536.727                            | $c_{15}$            | 1536.728                          | -0.6        |
| 853.416                    | 2            | 1704.817                            | $c_{17}$            | 1704.818                          | -0.3        |
| 659.343                    | 3            | 1974.002                            | $c_{19}$            | 1974.003                          | -0.7        |
| 711.376                    | 3            | 2130.103                            | $c_{20}$            | 2130.104                          | -0.5        |
| 572.807                    | 4            | 2286.197                            | $c_{21}$            | 2286.205                          | -3.4        |
| 819.076                    | 3            | 2453.203                            | $p$ $c_{22}$        | 2453.204                          | -0.4        |
| 874.739                    | 3            | 2620.194                            | $pp$ $c_{23}$       | 2620.202                          | -3.0        |
| 912.753                    | 3            | 2734.235                            | $pp$ $c_{24}$       | 2734.245                          | -3.8        |
| 967.107                    | 3            | 2897.298                            | $pp$ $c_{25}$       | 2897.308                          | -3.5        |
| 764.607                    | 4            | 3053.397                            | $pp$ $c_{26}$       | 3053.409                          | -4.2        |
| 866.404                    | 4            | 3459.584                            | $pp$ $c_{30}$       | 3459.595                          | -3.0        |
| 765.954                    | 5            | 3822.733                            | $pp$ $c_{33}$       | 3822.749                          | -4.1        |
| 714.351                    | 6            | 4278.056                            | $pp$ $c_{37}$       | 4278.071                          | -3.5        |
| 1153.072                   | 4            | 4606.254                            | $pp$ $c_{40}$       | 4606.282                          | -6.0        |
| 783.566                    | 6            | 4693.348                            | $pp$ $c_{41}$       | 4693.314                          | 7.2         |
| 836.086                    | 6            | 5007.459                            | $pp$ $c_{44}$       | 5007.484                          | -5.0        |
| 857.434                    | 6            | 5135.564                            | $pp$ $c_{45}$       | 5135.579                          | -2.9        |
| 876.281                    | 6            | 5248.640                            | $pp$ $c_{46}$       | 5248.663                          | -4.4        |
| 1076.947                   | 5            | 5376.687                            | $pp$ $c_{47}$       | 5376.722                          | -6.5        |
| 703.618                    | 8            | 5617.881                            | $pp$ $c_{49}$       | 5617.901                          | -3.5        |

|          |    |           |                    |           |      |
|----------|----|-----------|--------------------|-----------|------|
| 818.282  | 7  | 5718.919  | $ppc_{50}$         | 5718.948  | -5.2 |
| 737.731  | 9  | 6626.508  | $ppc_{58}$         | 6626.534  | -3.9 |
| 845.951  | 8  | 6755.547  | $ppc_{59}$         | 6755.577  | -4.3 |
| 920.739  | 8  | 7353.848  | $ppc_{64}$         | 7353.884  | -4.9 |
| 936.870  | 8  | 7482.895  | $ppc_{65}$         | 7482.927  | -4.2 |
| 1088.999 | 7  | 7611.951  | $ppc_{66}$         | 7611.969  | -2.4 |
| 888.246  | 9  | 7981.160  | $ppc_{69}$         | 7981.193  | -4.2 |
| 916.705  | 9  | 8238.268  | $ppc_{71}$         | 8238.330  | -7.6 |
| 803.609  | 11 | 8823.607  | $ppc_{77}$         | 8823.654  | -5.3 |
| 827.074  | 11 | 9082.727  | $ppc_{79}$         | 9082.764  | -4.1 |
| 967.913  | 10 | 9663.046  | $ppc_{84}$         | 9663.086  | -4.2 |
| 794.428  | 13 | 10308.463 | $ppc_{91}$         | 10308.398 | 6.3  |
| 1304.463 | 8  | 10421.632 | $ppc_{92}$         | 10421.482 | 14.4 |
| 930.878  | 13 | 12083.315 | $ppc_{106}$        | 12083.361 | -3.8 |
| 1028.893 | 12 | 12327.614 | $ppc_{108}$        | 12327.430 | 14.9 |
| 868.465  | 15 | 13003.850 | $ppc_{113}$        | 13003.748 | 7.8  |
| 822.304  | 16 | 13132.740 | $ppc_{114}$        | 13132.791 | -3.9 |
| 1017.295 | 13 | 13203.758 | $ppc_{115}$        | 13203.828 | -5.3 |
| 1129.342 | 12 | 13531.997 | $ppc_{118}$        | 13532.039 | -3.1 |
| 869.463  | 16 | 13887.272 | $ppc_{121}$        | 13887.261 | 0.8  |
| 845.005  | 20 | 16869.947 | $ppc_{146}$        | 16869.985 | -2.3 |
| 849.424  | 22 | 18654.145 | $ppc_{163}$        | 18653.940 | 11.0 |
| 859.278  | 27 | 23159.292 | $ppc_{202}$        | 23159.212 | 3.4  |
| 857.817  | 28 | 23975.647 | $ppc_{208}$        | 23975.709 | -2.6 |
| 494.237  | 1  | 493.229   | $z^{\bullet}_4$    | 493.230   | -0.9 |
| 622.332  | 1  | 621.324   | $z^{\bullet}_5$    | 621.325   | -0.6 |
| 750.427  | 1  | 749.420   | $z^{\bullet}_6$    | 749.420   | -0.3 |
| 906.528  | 1  | 905.520   | $z^{\bullet}_7$    | 905.521   | -0.5 |
| 482.276  | 2  | 962.539   | $z^{\bullet}_8$    | 962.542   | -3.6 |
| 1092.589 | 1  | 1091.583  | $z^{\bullet}_9$    | 1091.585  | -2.2 |
| 612.320  | 2  | 1222.625  | $z^{\bullet}_{10}$ | 1222.625  | -0.5 |
| 640.830  | 2  | 1279.646  | $z^{\bullet}_{11}$ | 1279.647  | -0.7 |

|          |   |          |                    |          |      |
|----------|---|----------|--------------------|----------|------|
| 740.888  | 2 | 1479.762 | $z_{13}^{\bullet}$ | 1479.763 | -0.6 |
| 776.407  | 2 | 1550.799 | $z_{14}^{\bullet}$ | 1550.800 | -0.4 |
| 833.920  | 2 | 1665.826 | $z_{15}^{\bullet}$ | 1665.827 | -0.4 |
| 890.460  | 2 | 1778.906 | $z_{16}^{\bullet}$ | 1778.911 | -2.7 |
| 947.986  | 2 | 1892.953 | $z_{17}^{\bullet}$ | 1892.954 | -0.7 |
| 675.022  | 3 | 2021.043 | $z_{18}^{\bullet}$ | 2021.049 | -3.1 |
| 727.058  | 3 | 2177.149 | $z_{19}^{\bullet}$ | 2177.150 | -0.3 |
| 789.084  | 3 | 2363.228 | $z_{20}^{\bullet}$ | 2363.229 | -0.7 |
| 1240.637 | 2 | 2478.256 | $z_{21}^{\bullet}$ | 2478.256 | -0.2 |
| 1269.146 | 2 | 2535.279 | $z_{22}^{\bullet}$ | 2535.278 | 0.5  |
| 1318.679 | 2 | 2634.345 | $z_{23}^{\bullet}$ | 2634.346 | -0.6 |
| 1383.203 | 2 | 2763.388 | $z_{24}^{\bullet}$ | 2763.389 | -0.3 |
| 974.505  | 3 | 2919.486 | $z_{25}^{\bullet}$ | 2919.490 | -1.3 |
| 1012.520 | 3 | 3033.531 | $z_{26}^{\bullet}$ | 3033.533 | -0.6 |
| 1055.533 | 3 | 3162.575 | $z_{27}^{\bullet}$ | 3162.575 | -0.1 |
| 1098.232 | 3 | 3290.670 | $z_{28}^{\bullet}$ | 3290.670 | -0.1 |
| 1141.580 | 3 | 3419.715 | $z_{29}^{\bullet}$ | 3419.713 | 0.5  |
| 881.698  | 4 | 3520.755 | $z_{30}^{\bullet}$ | 3520.761 | -1.5 |
| 1213.605 | 3 | 3635.790 | $z_{31}^{\bullet}$ | 3635.788 | 0.6  |
| 754.371  | 5 | 3764.817 | $z_{32}^{\bullet}$ | 3764.830 | -3.5 |
| 1375.039 | 3 | 4120.093 | $z_{35}^{\bullet}$ | 4120.088 | 1.0  |
| 1417.727 | 3 | 4248.151 | $z_{36}^{\bullet}$ | 4248.147 | 0.8  |
| 876.653  | 5 | 4376.225 | $z_{37}^{\bullet}$ | 4376.242 | -3.9 |
| 1123.841 | 4 | 4489.328 | $z_{38}^{\bullet}$ | 4489.326 | 0.4  |
| 772.402  | 6 | 4626.367 | $z_{39}^{\bullet}$ | 4626.385 | -4.0 |
| 940.886  | 5 | 4697.398 | $z_{40}^{\bullet}$ | 4697.422 | -5.2 |
| 694.795  | 7 | 4853.510 | $z_{41}^{\bullet}$ | 4853.523 | -2.8 |
| 1243.412 | 4 | 4966.586 | $z_{42}^{\bullet}$ | 4966.607 | -4.3 |
| 1272.167 | 4 | 5081.633 | $z_{43}^{\bullet}$ | 5081.634 | -0.3 |
| 1300.439 | 4 | 5194.715 | $z_{44}^{\bullet}$ | 5194.718 | -0.7 |
| 1322.198 | 4 | 5281.759 | $z_{45}^{\bullet}$ | 5281.750 | 1.6  |

|          |    |           |                    |           |      |
|----------|----|-----------|--------------------|-----------|------|
| 1354.458 | 4  | 5410.812  | $z_{46}^{\bullet}$ | 5410.793  | 3.5  |
| 693.748  | 8  | 5538.920  | $z_{47}^{\bullet}$ | 5538.888  | 5.9  |
| 1404.240 | 4  | 5609.928  | $z_{48}^{\bullet}$ | 5609.925  | 0.6  |
| 825.151  | 7  | 5766.001  | $z_{49}^{\bullet}$ | 5766.026  | -4.4 |
| 1461.025 | 4  | 5837.063  | $z_{50}^{\bullet}$ | 5837.063  | 0.0  |
| 738.141  | 8  | 5894.065  | $z_{51}^{\bullet}$ | 5894.085  | -3.3 |
| 1203.043 | 5  | 6007.156  | $z_{52}^{\bullet}$ | 6007.169  | -2.2 |
| 1021.547 | 6  | 6120.233  | $z_{53}^{\bullet}$ | 6120.253  | -3.2 |
| 885.903  | 7  | 6191.265  | $z_{54}^{\bullet}$ | 6191.290  | -4.0 |
| 1054.733 | 6  | 6319.350  | $z_{55}^{\bullet}$ | 6319.348  | 0.2  |
| 1291.685 | 5  | 6450.390  | $z_{56}^{\bullet}$ | 6450.389  | 0.2  |
| 941.784  | 7  | 6581.432  | $z_{57}^{\bullet}$ | 6581.429  | 0.3  |
| 951.925  | 7  | 6652.419  | $z_{58}^{\bullet}$ | 6652.467  | -7.1 |
| 1355.307 | 5  | 6767.491  | $z_{59}^{\bullet}$ | 6767.493  | -0.3 |
| 761.287  | 9  | 6838.513  | $z_{60}^{\bullet}$ | 6838.531  | -2.5 |
| 1386.922 | 5  | 6925.563  | $z_{61}^{\bullet}$ | 6925.563  | 0.0  |
| 1029.402 | 7  | 7194.753  | $z_{63}^{\bullet}$ | 7194.748  | 0.7  |
| 1217.310 | 6  | 7293.803  | $z_{64}^{\bullet}$ | 7293.816  | -1.8 |
| 1243.329 | 6  | 7449.871  | $z_{65}^{\bullet}$ | 7449.917  | -6.2 |
| 952.260  | 8  | 7606.019  | $z_{66}^{\bullet}$ | 7606.018  | 0.1  |
| 773.316  | 10 | 7719.080  | $z_{67}^{\bullet}$ | 7719.102  | -2.9 |
| 1305.034 | 6  | 7820.156  | $z_{68}^{\bullet}$ | 7820.150  | 0.7  |
| 1154.909 | 7  | 8073.303  | $z_{70}^{\bullet}$ | 8073.304  | -0.1 |
| 929.172  | 9  | 8348.471  | $z_{72}^{\bullet}$ | 8348.467  | 0.5  |
| 949.739  | 9  | 8533.574  | $z_{74}^{\bullet}$ | 8533.584  | -1.2 |
| 870.477  | 10 | 8689.686  | $z_{75}^{\bullet}$ | 8689.685  | 0.2  |
| 1101.980 | 8  | 8802.739  | $z_{76}^{\bullet}$ | 8802.769  | -3.4 |
| 1275.694 | 7  | 8917.795  | $z_{77}^{\bullet}$ | 8917.796  | -0.2 |
| 756.828  | 12 | 9064.838  | $z_{78}^{\bullet}$ | 9064.864  | -2.9 |
| 966.427  | 10 | 9648.250  | $z_{83}^{\bullet}$ | 9648.234  | 1.7  |
| 988.903  | 11 | 10860.805 | $z_{94}^{\bullet}$ | 10860.905 | -9.3 |



|          |    |           |                       |           |      |
|----------|----|-----------|-----------------------|-----------|------|
| 842.384  | 13 | 10931.883 | $z_{95}^{\bullet}$    | 10931.942 | -5.5 |
| 738.804  | 15 | 11060.939 | $z_{96}^{\bullet}$    | 11060.985 | -4.1 |
| 1162.537 | 10 | 11608.248 | $z_{100}^{\bullet}$   | 11608.260 | -1.1 |
| 1320.274 | 9  | 11866.306 | $z_{102}^{\bullet}$   | 11866.345 | -3.3 |
| 1333.051 | 9  | 11981.393 | $z_{103}^{\bullet}$   | 11981.372 | 1.8  |
| 1222.563 | 10 | 12208.547 | $z_{105}^{\bullet}$   | 12208.536 | 1.0  |
| 1234.067 | 10 | 12323.584 | $z_{106}^{\bullet}$   | 12323.563 | 1.7  |
| 1145.165 | 11 | 12578.722 | $z_{108}^{\bullet}$   | 12578.732 | -0.8 |
| 822.441  | 17 | 13956.366 | $z_{120}^{\bullet}$   | 13956.414 | -3.5 |
| 1154.162 | 13 | 14981.990 | $z_{130}^{\bullet}$   | 14981.969 | 1.4  |
| 1037.996 | 16 | 16581.805 | $z_{144}^{\bullet}$   | 16581.807 | -0.1 |
| 1025.655 | 22 | 22528.221 | $ppz_{194}^{\bullet}$ | 22528.005 | 9.6  |
| 998.902  | 24 | 23934.561 | $ppz_{208}^{\bullet}$ | 23934.659 | -4.1 |

## Supplemental Figures

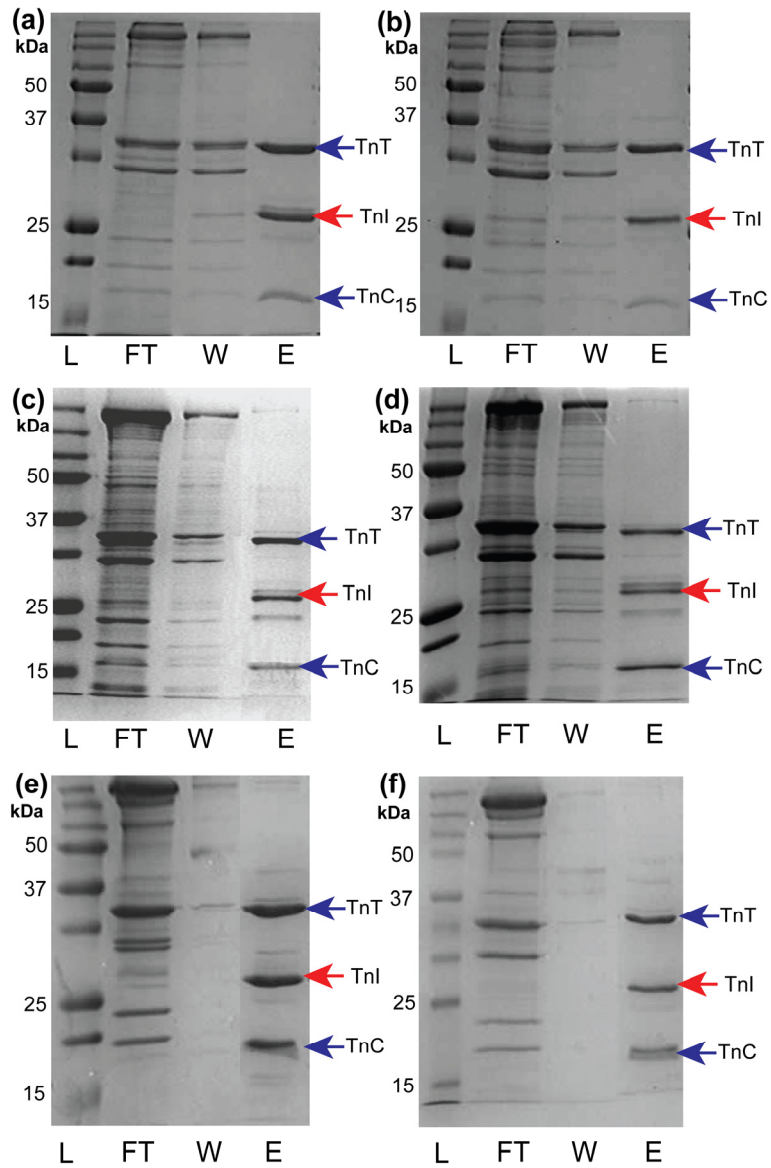

**Fig. S1. Representative SDS-PAGE analysis of immunoaffinity purification of cTn from postmortem (a-d) and transplant (e-f) human myocardial tissues.** (a) NOR1; (b) HYP3; (c) SHD3; (d) CHF1; (e) DOR4; (f) DCM4. L stands for molecular markers; FT, flow through; W, wash; E, affinity elution with 0.1 M glycine solution.

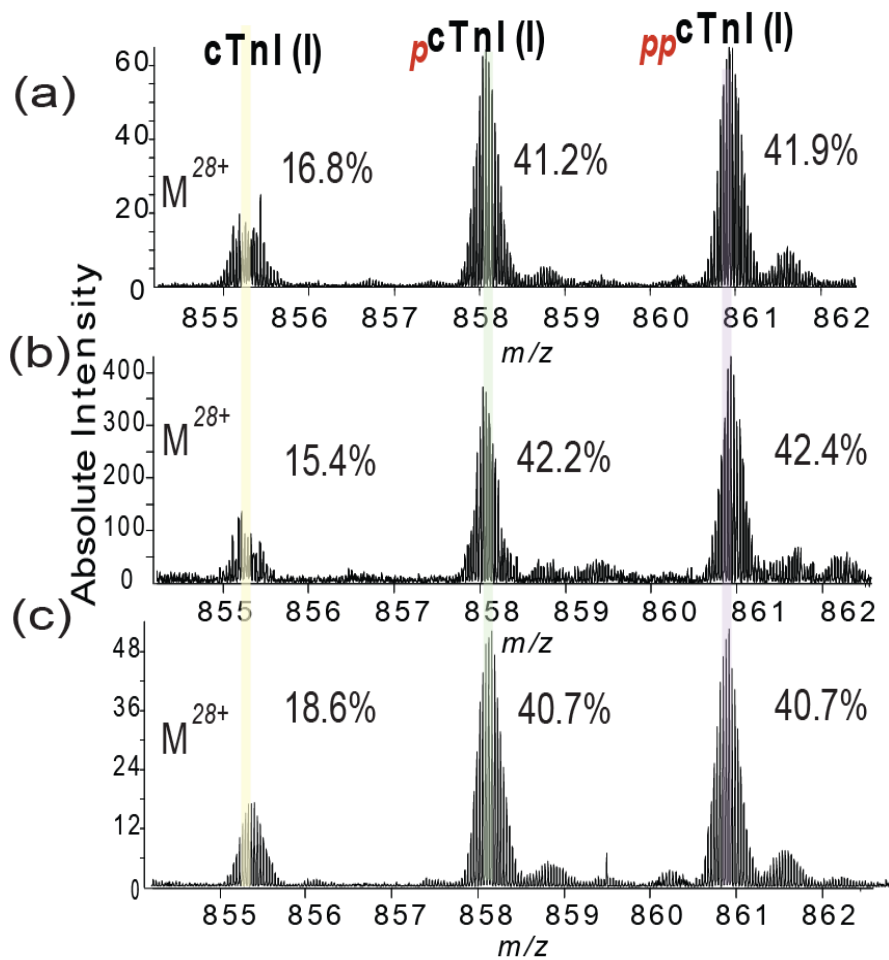

**Fig. S2. Technical reproducibility of top-down quantitative proteomics analysis of cTnI phosphorylation.** (a-c) three representative experimental repeated measurements (technical replicates) for one biological sample (NOR1). Subscript *p* stands for monophosphorylation and *pp* stands for bisphosphorylation.

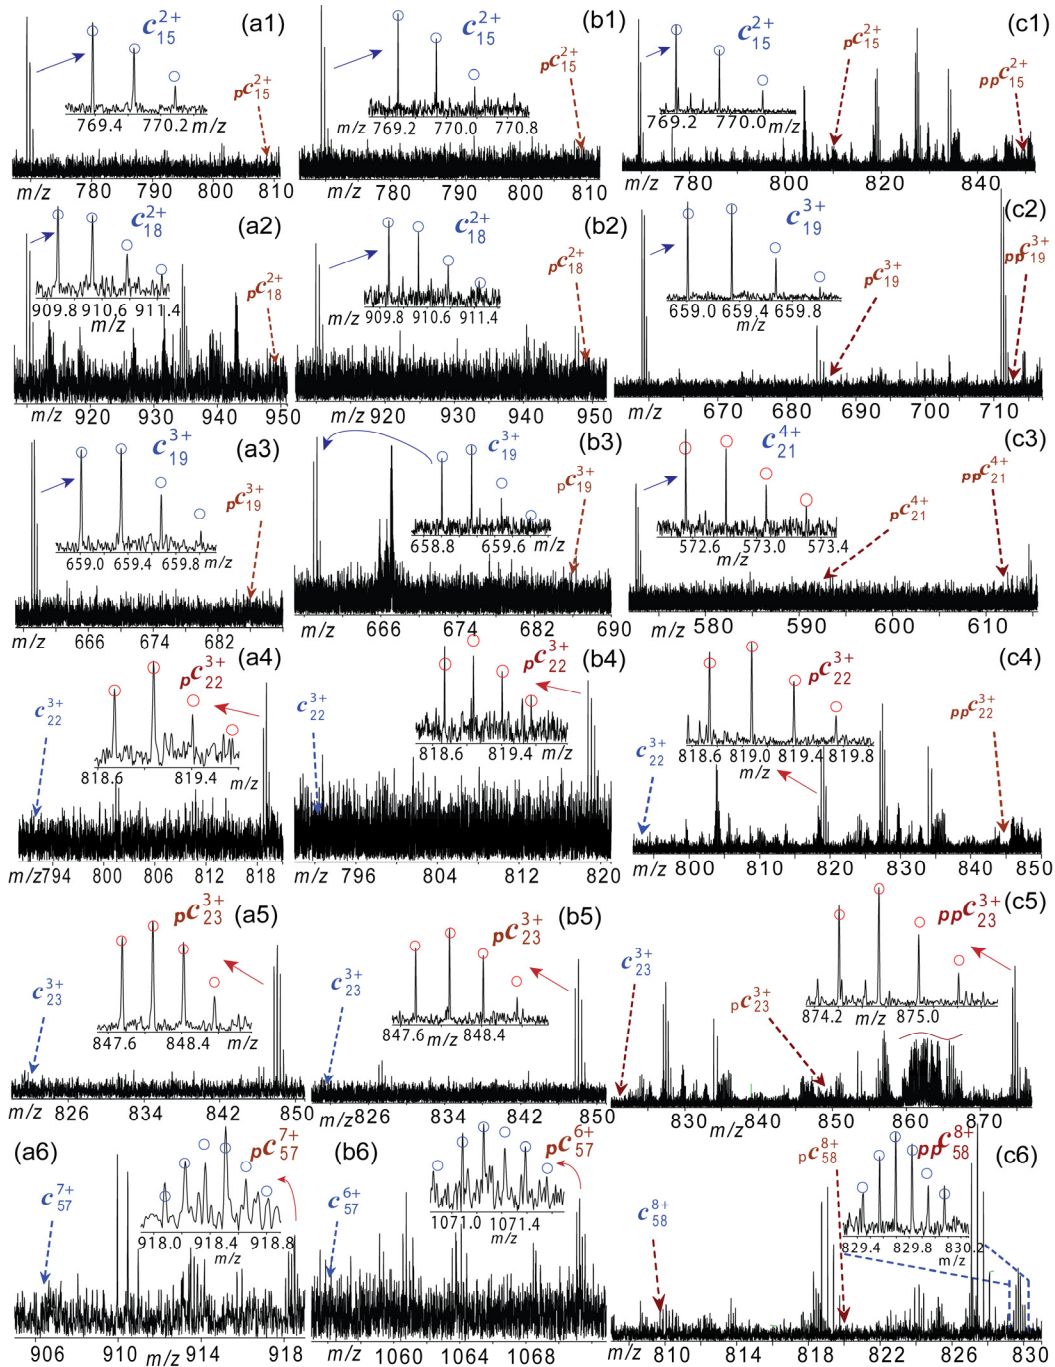

**Fig. S3. Mapping phosphorylation site(s) in mono- and bis-phosphorylated cTnI purified from normal and diseased heart samples.** (a1-6), key product ions from ECD fragmentation of mono-phosphorylated cTnI ( $p$ cTnI) in a normal heart sample (NOR1); (b1-6), key product ions from ECD fragmentation of mono-phosphorylated cTnI ( $p$ cTnI) in a hypertrophic heart sample (HYP2); (c1-6), key product ions from ECD fragmentation of bis-phosphorylated cTnI ( $pp$ cTnI) in a normal heart sample (NOR1). ECD was not performed on the bis-phosphorylated cTnI in diseased heart samples due to its low abundance.

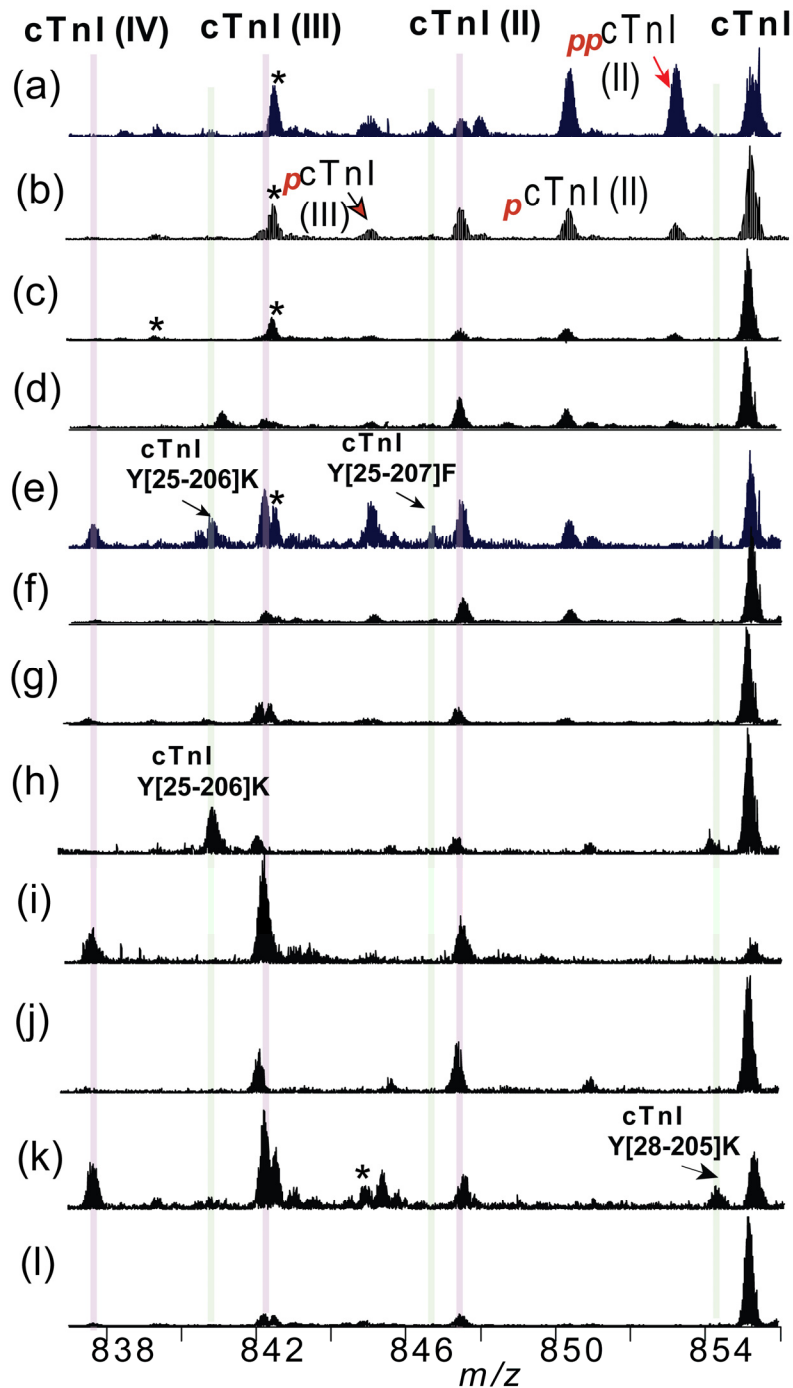

**Fig. S4. Correlation between cTnI degradation level and heart disease conditions in postmortem samples.** (a-c) NOR1-3; (d-f) HYP1-3; (g-i) SHD1-3; (j-l) CHF1-3. Only representative cases are shown. The three C-terminally truncated cTnI isoforms (II-IV) and three major degradation products are labeled and highlighted. Subscript *p* stands for mono-phosphorylation and *pp* stands for bis-phosphorylation. Asterisks represent the co-purified cTnT related products.

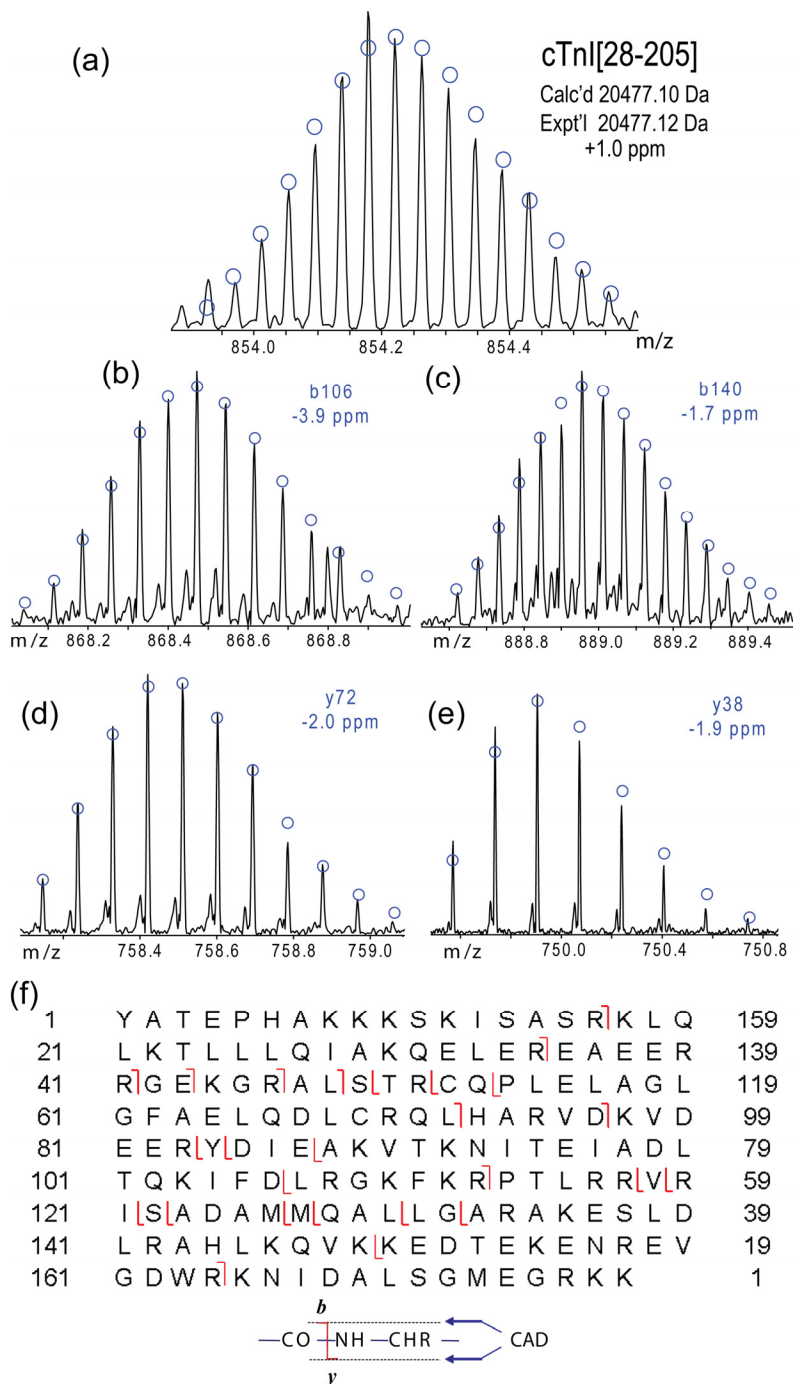

**Fig. S5. Sequence confirmation of representative major cTnI proteolytic products by high accuracy mass measurements and MS/MS fragmentation.** (a) High accuracy mass measurement of cTnI Y[28-205]K; (b)-(e) key product ions of cTnI Y[28-205]K; (f) fragmentation map of CAD experiment of cTnI Y[28-205]K.

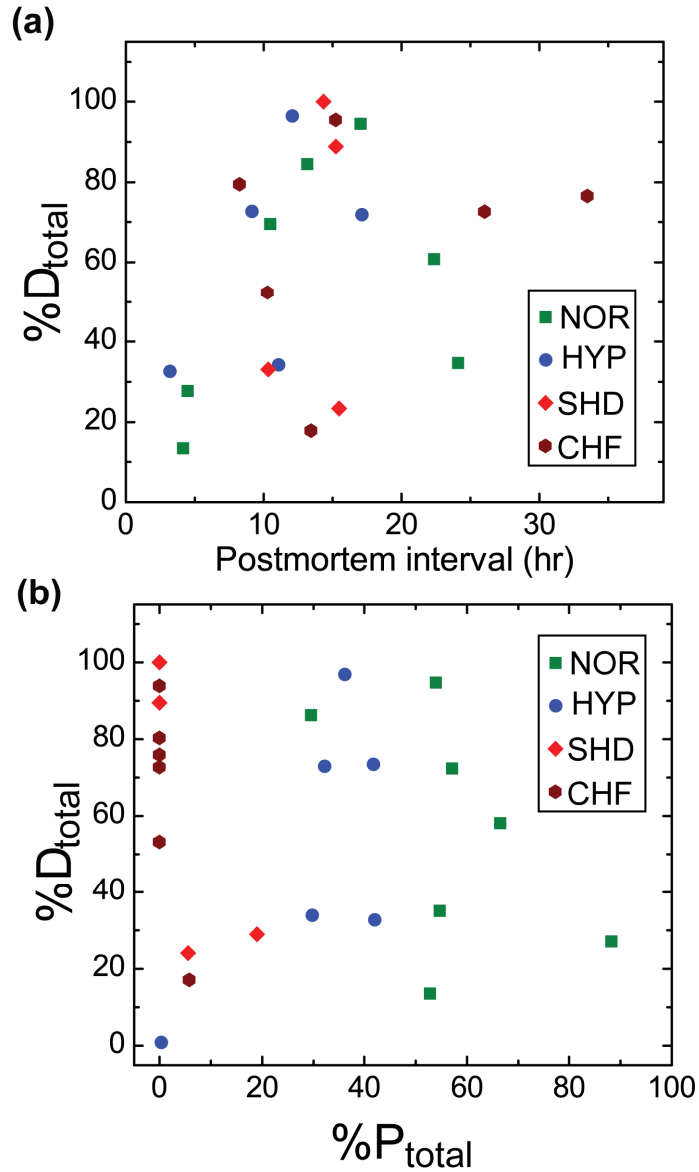

**Fig. S6. Correlations between (a) cTnI degradation levels and postmortem interval and (b) cTnI degradation and phosphorylation level. No significant correlation was observed between these parameters.**

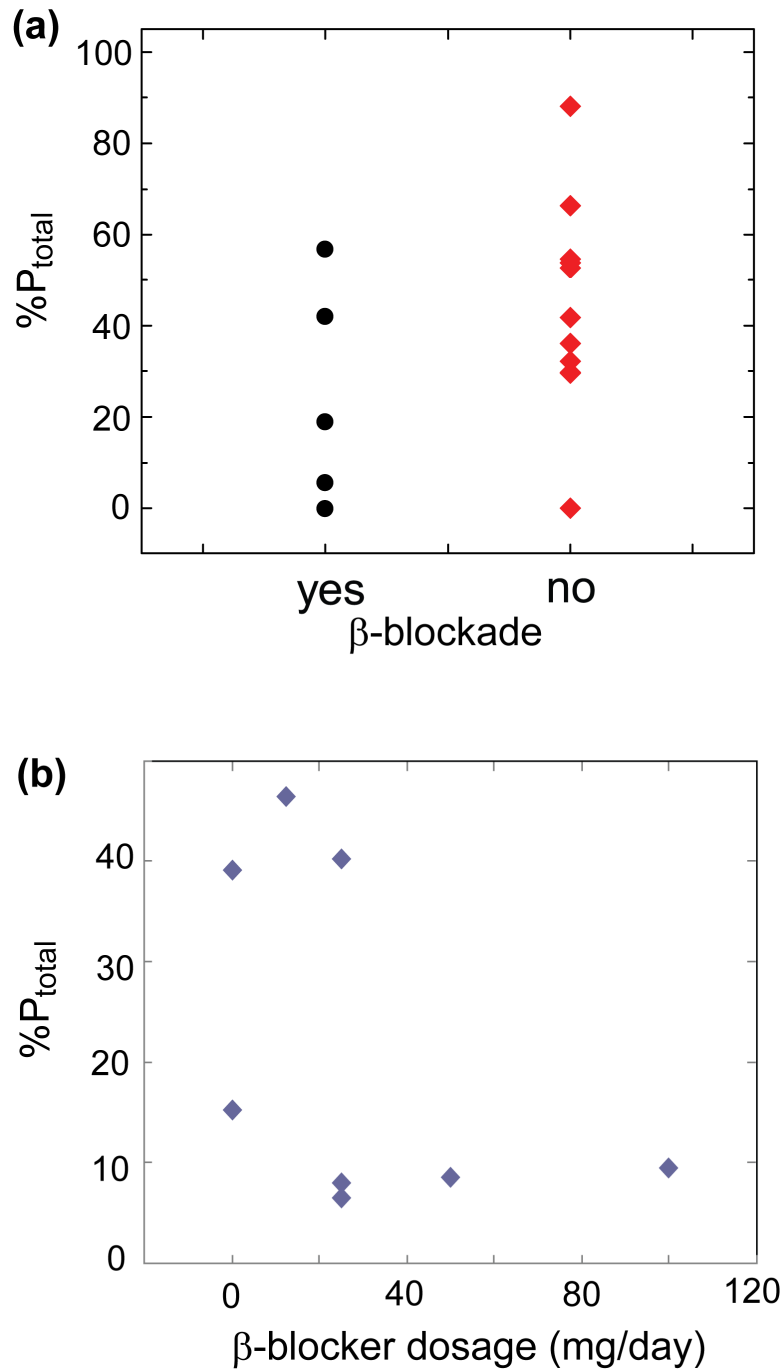

**Fig. S7. Correlation between  $\beta$ -blockade and cTnI phosphorylation.** (a) From post-mortem hearts including both control and diseased groups; (b) from transplant hearts of ICM/DCM. Detailed clinical characteristics are listed in Table S1 and S2. %P<sub>total</sub>, total phosphorylated cTnI percentage over the entire cTnI populations. No significant correlation was observed between these parameters.



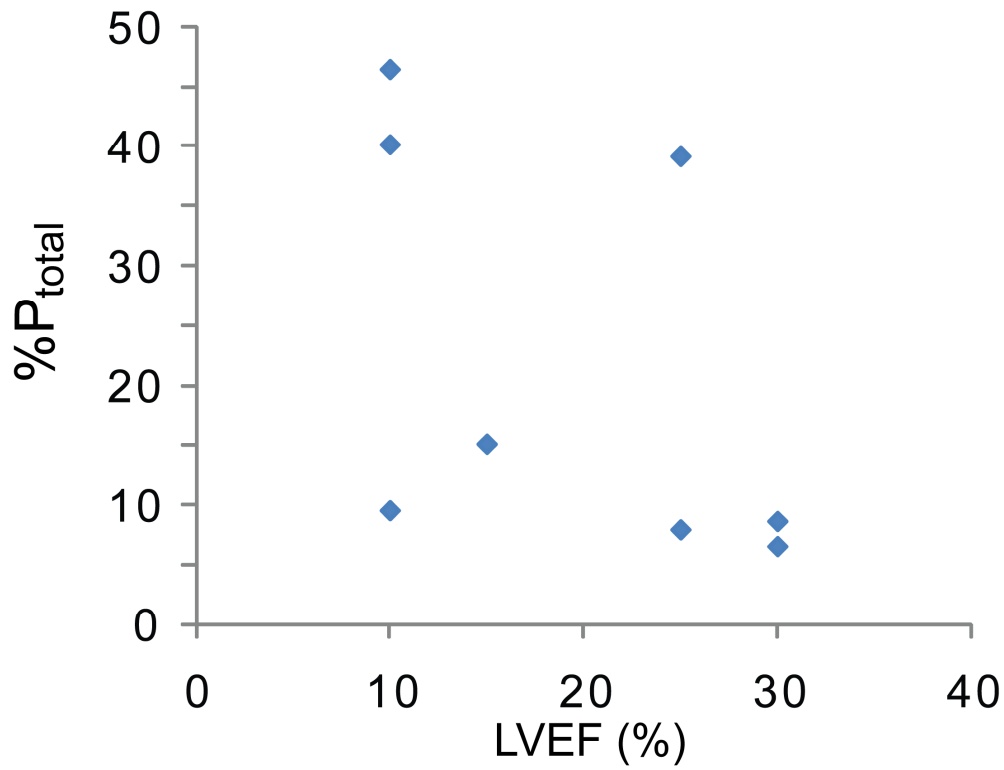

**Fig. S8. Correlation between left ventricular ejection fraction (LVEF) and cTnI phosphorylation.** Samples were from ICM/DCM group (see Table S2 for detailed clinical characteristics). No significant correlation was observed between these parameters.
